# Supplementary material
Source: PubMed Central journal article supplement (PMC6765175)

Supplementary Information

**Figure S1. Relationship between ( $\log_{10}$ ) muscle mass and ( $\log_{10}$ ) bird mass for each individual muscle. Red line indicates linear fit of reduced major axis regression. Grey lines indicate 95 % confidence intervals of the regression. Abbreviations: ILTC – Iliotibialis cranialis; A – Ambiens; FTE – Femorotibialis externus; FTM – Femorotibialis medius; FTA – Femorotibialis accessorius; FTI – Femorotibialis internus; ILTL – Iliotibialis lateralis; FCM – Flexor cruris medialis; FCL – Flexor cruris lateralis; CF – Caudofemoralis; PIF – Pubo-ischio-femoralis; OM – Obturatorius medialis; ILF - Iliofibularis; G - Gastrocnemius; FPPD3 – Flexor perforans et perforatus digiti III; FPD3 – Flexor perforatus digiti III; FPD4 – Flexor perforatus digiti IV; FDL – Flexor digitorum longus; FL – Fibularis longus; TC – Tibialis cranialis; EDL – Extensor digitorum longus**

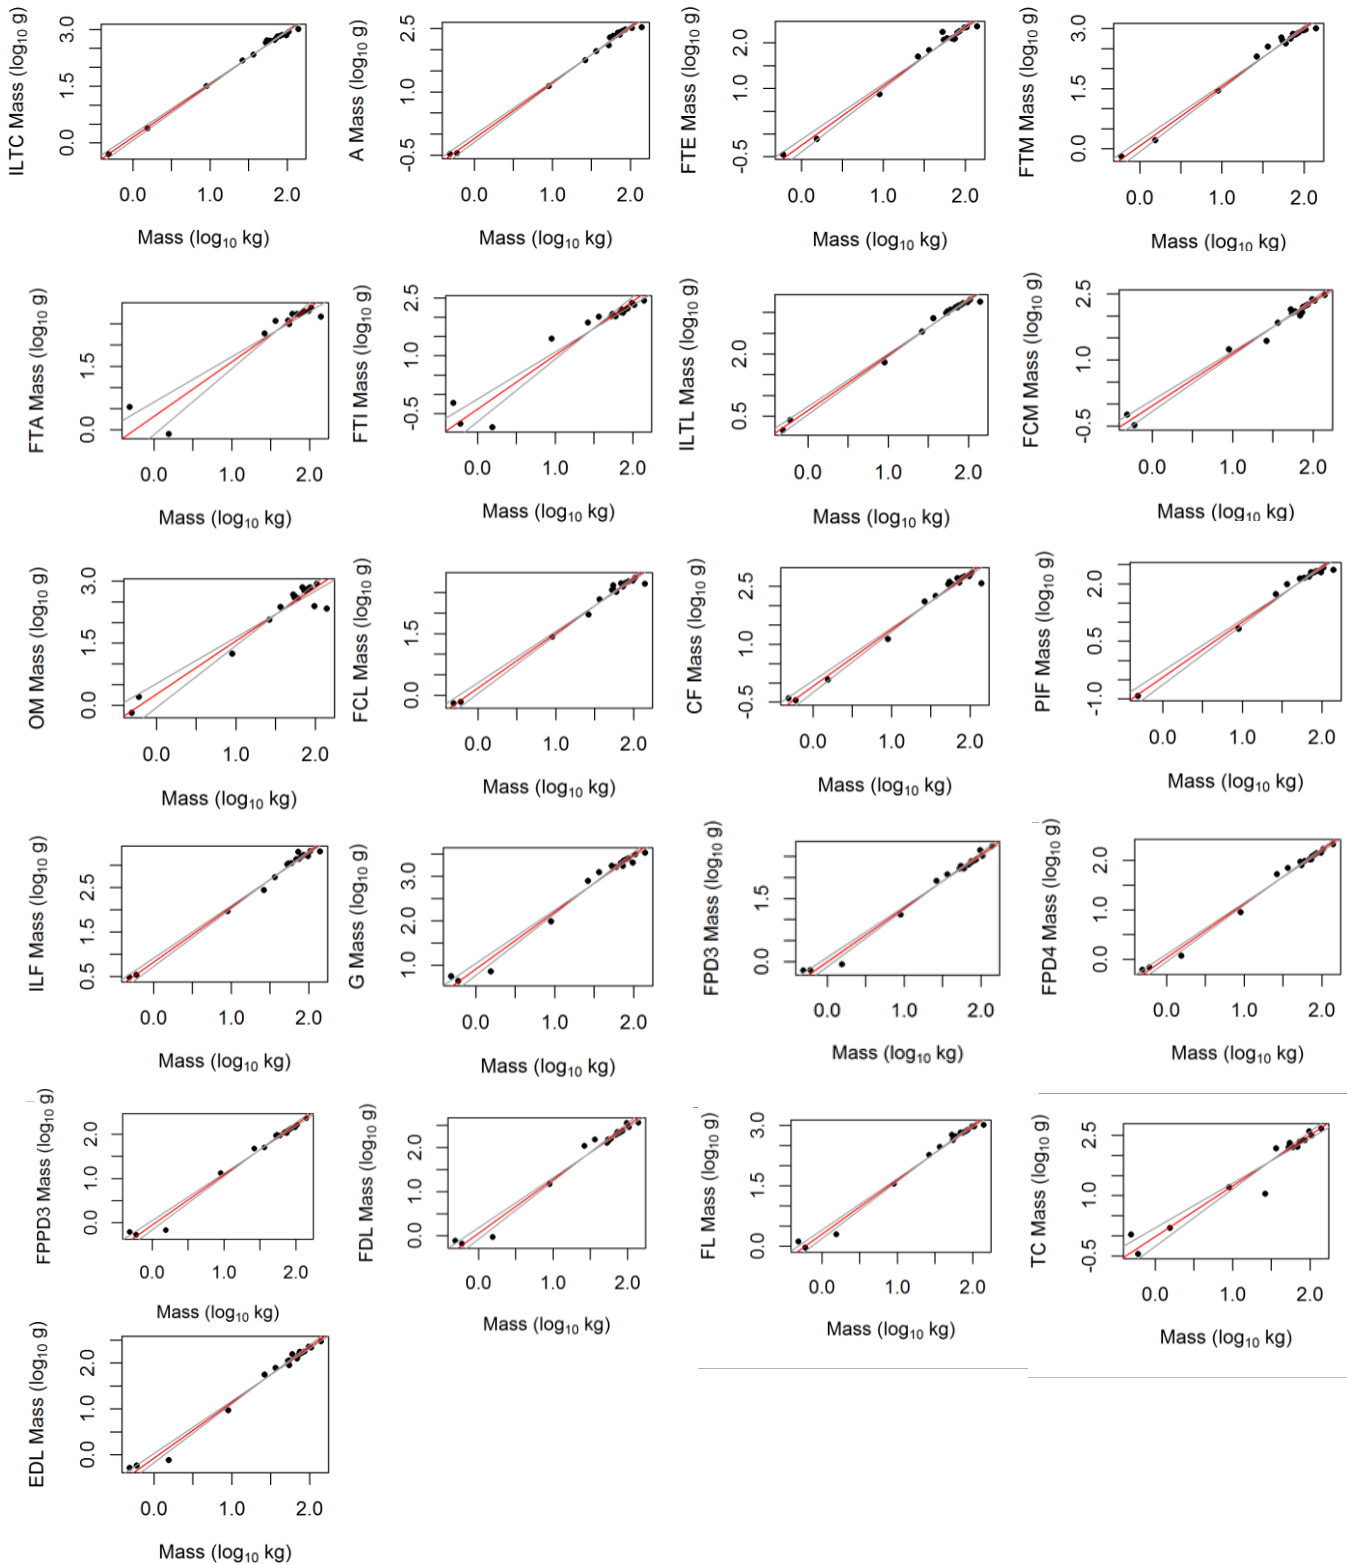

**Figure S2. Relationship between ( $\log_{10}$ ) muscle length and ( $\log_{10}$ ) bird mass for each individual muscle. Red line indicates linear fit of reduced major axis regression. Grey lines indicate 95 % confidence intervals of the regression. Abbreviations: ILTC – Iliotibialis cranialis; A – Ambiens; FTE – Femorotibialis externus; FTM – Femorotibialis medius; FTA – Femorotibialis accessorius; FTI – Femorotibialis internus; ILTL – Iliotibialis lateralis; FCM – Flexor cruris medialis; FCL – Flexor cruris lateralis; CF – Caudofemoralis; PIF – Pubo-ischio-femoralis; OM – Obturatorius medialis; ILF – Iliofibularis; G - Gastrocnemius; FPPD3 – Flexor perforans et perforatus digiti III; FPD3 – Flexor perforatus digiti III; FPD4 – Flexor perforatus digiti IV; FDL – Flexor digitorum longus; FL – Fibularis longus; TC – Tibialis cranialis; EDL – Extensor digitorum longus**

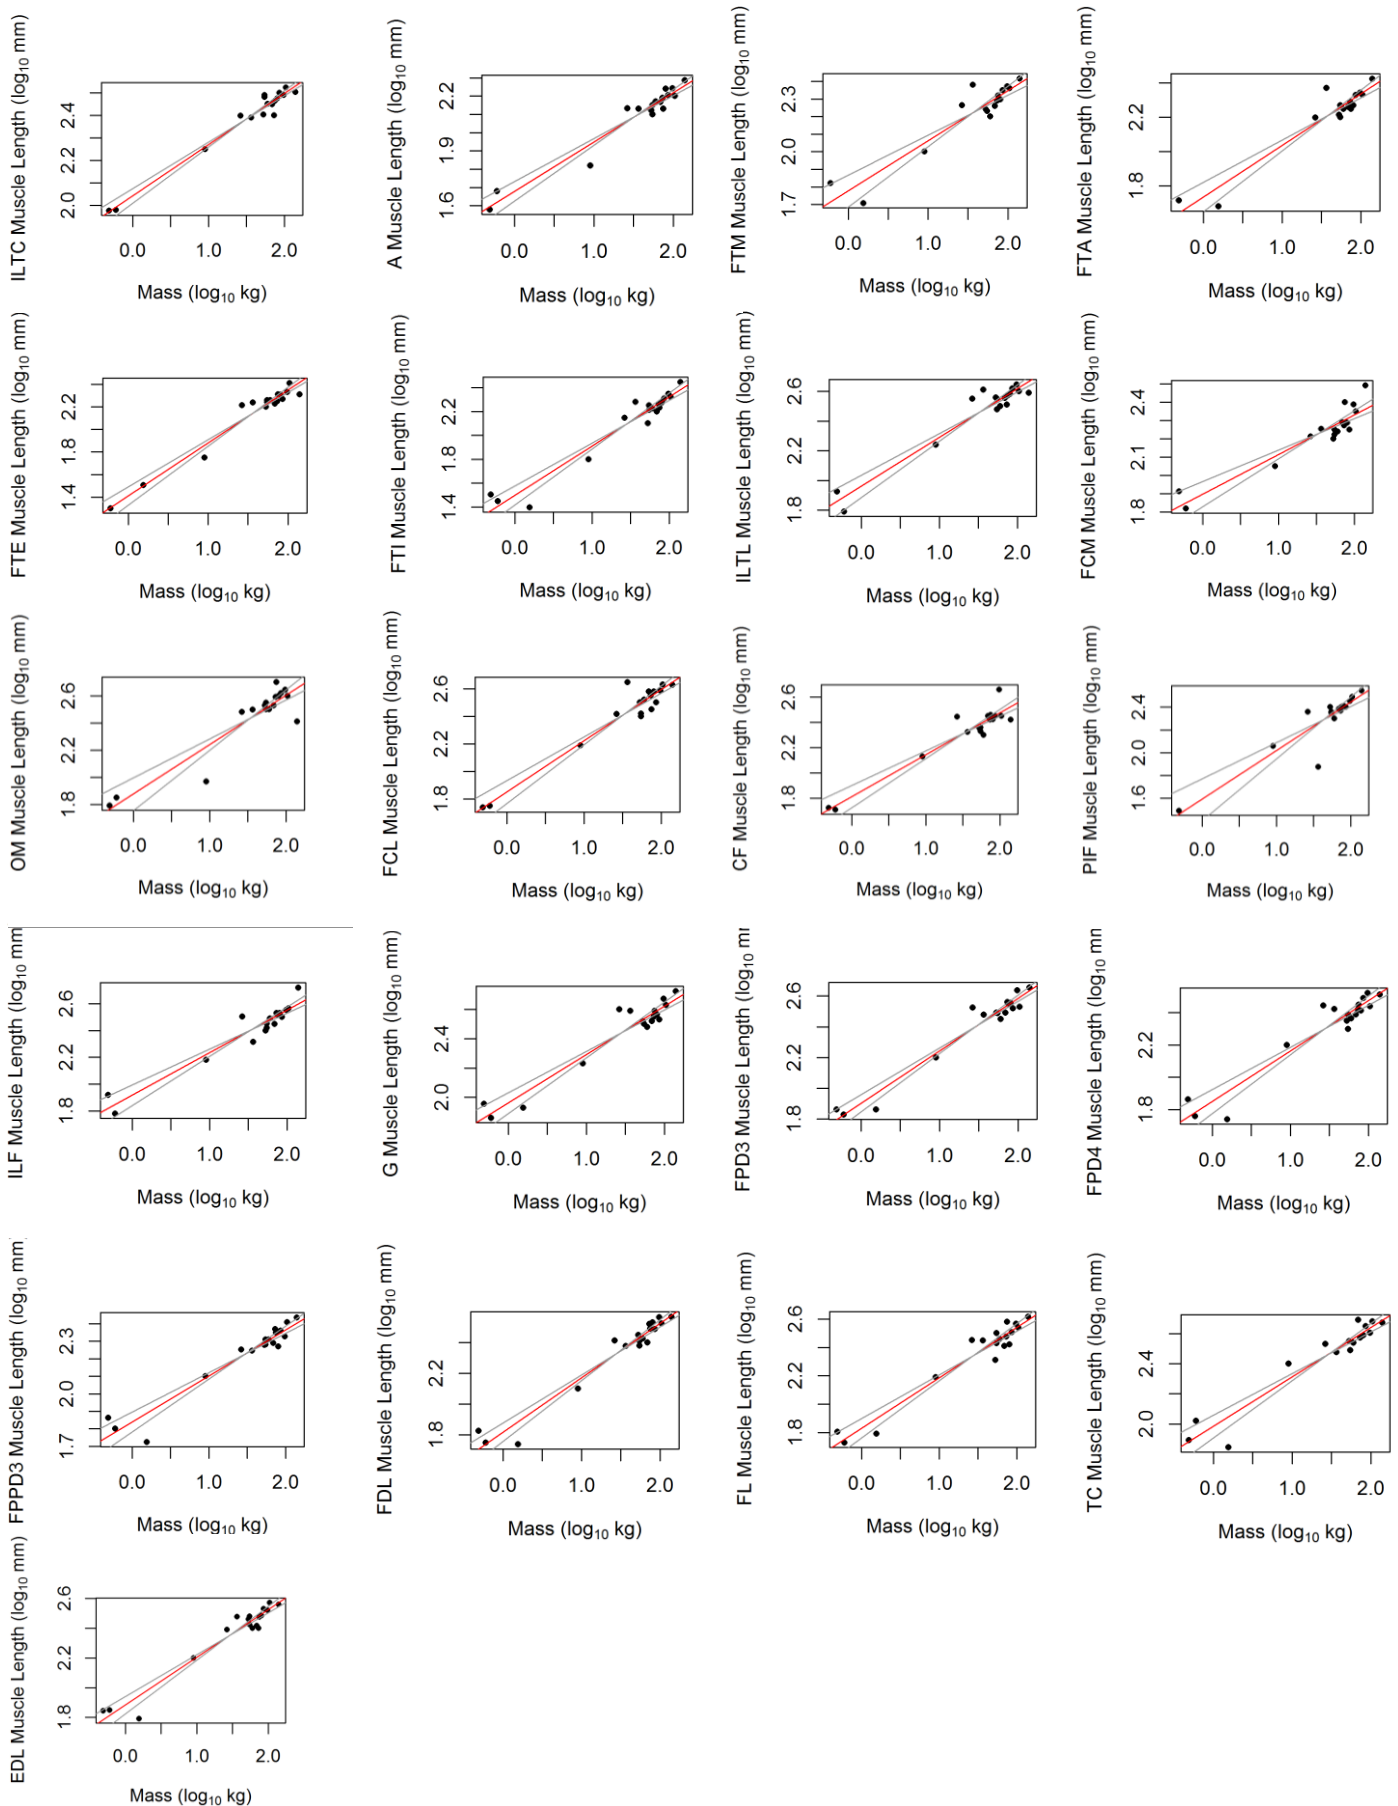

**Figure S3. Relationship between ( $\log_{10}$ ) mean muscle fibre length and ( $\log_{10}$ ) bird mass for each individual muscle. Red line indicates linear fit of reduced major axis regression. Grey lines indicate 95 % confidence intervals of the regression. Abbreviations: ILTC – Iliotibialis cranialis; A – Ambiens; FTE – Femorotibialis externus; FTM – Femorotibialis medius; FTA – Femorotibialis accessorius; FTI – Femorotibialis internus; ILTL – Iliotibialis lateralis; FCM – Flexor cruris medialis; FCL – Flexor cruris lateralis; CF – Caudofemoralis; PIF – Pubo-ischio-femoralis; OM – Obturatorius medialis; ILF – Iliofibularis; G - Gastrocnemius; FPPD3 – Flexor perforans et perforatus digiti III; FPD3 – Flexor perforatus digiti III; FPD4 – Flexor perforatus digiti IV; FDL – Flexor digitorum longus; FL – Fibularis longus; TC – Tibialis cranialis; EDL – Extensor digitorum longus**

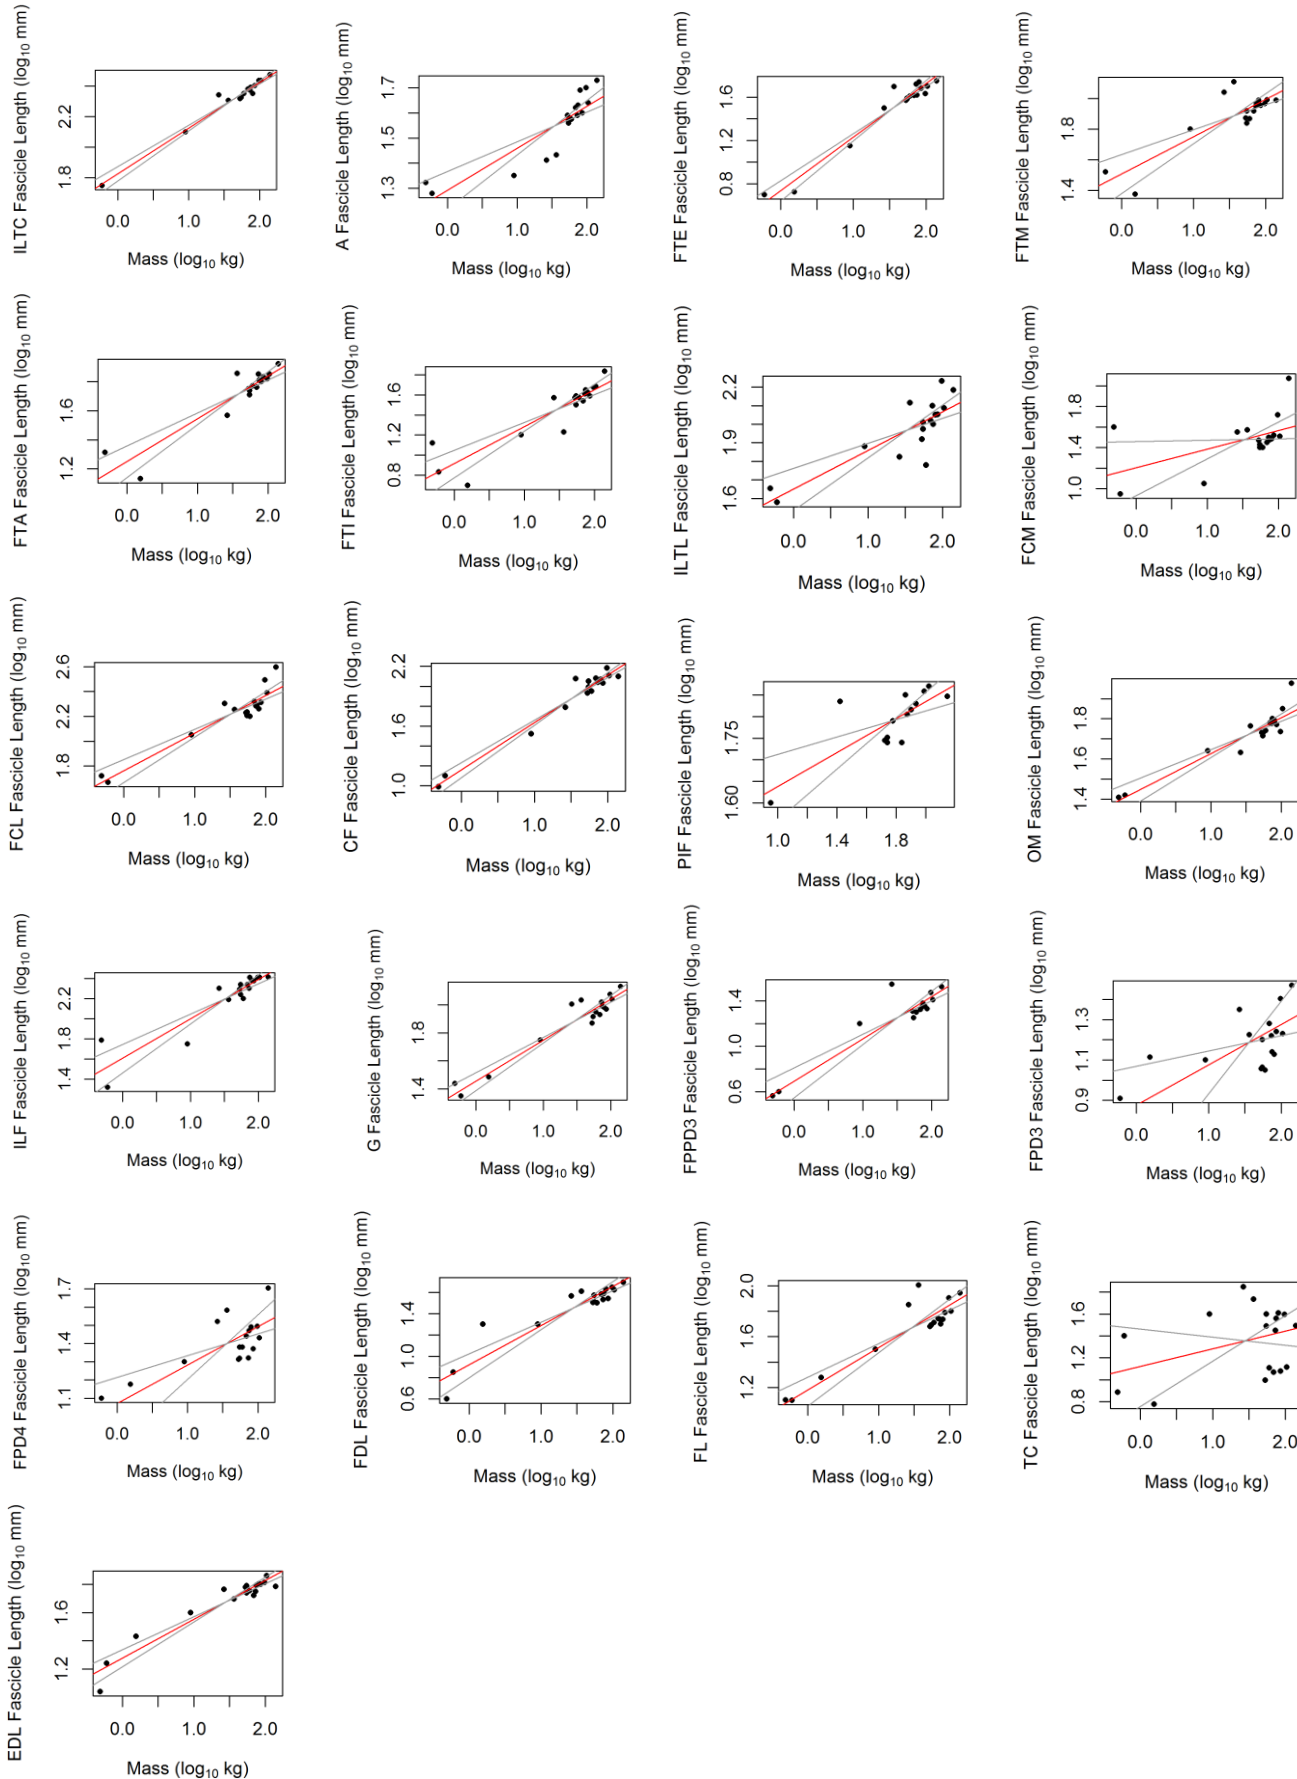

**Figure S4. Relationship between ( $\log_{10}$ ) Muscle Physiological Cross Sectional Area (PCSA) and ( $\log_{10}$ ) bird mass for each individual muscle. Red line indicates linear fit of reduced major axis regression. Grey lines indicate 95 % confidence intervals of the regression. Abbreviations: ILTC – Iliotibialis cranialis; A – Ambiens; FTE – Femorotibialis externus; FTM – Femorotibialis medius; FTA – Femorotibialis accessorius; FTI – Femorotibialis internus; ILTL – Iliotibialis lateralis; FCM – Flexor cruris medialis; FCL – Flexor cruris lateralis; CF – Caudofemoralis; PIF – Pubo-ischio-femoralis; OM – Obturatorius medialis; ILF - Iliofibularis; G - Gastrocnemius; FPPD3 – Flexor perforans et perforatus digiti III; FPD3 – Flexor perforatus digiti III; FPD4 – Flexor perforatus digiti IV; FDL – Flexor digitorum longus; FL – Fibularis longus; TC – Tibialis cranialis; EDL – Extensor digitorum longus**

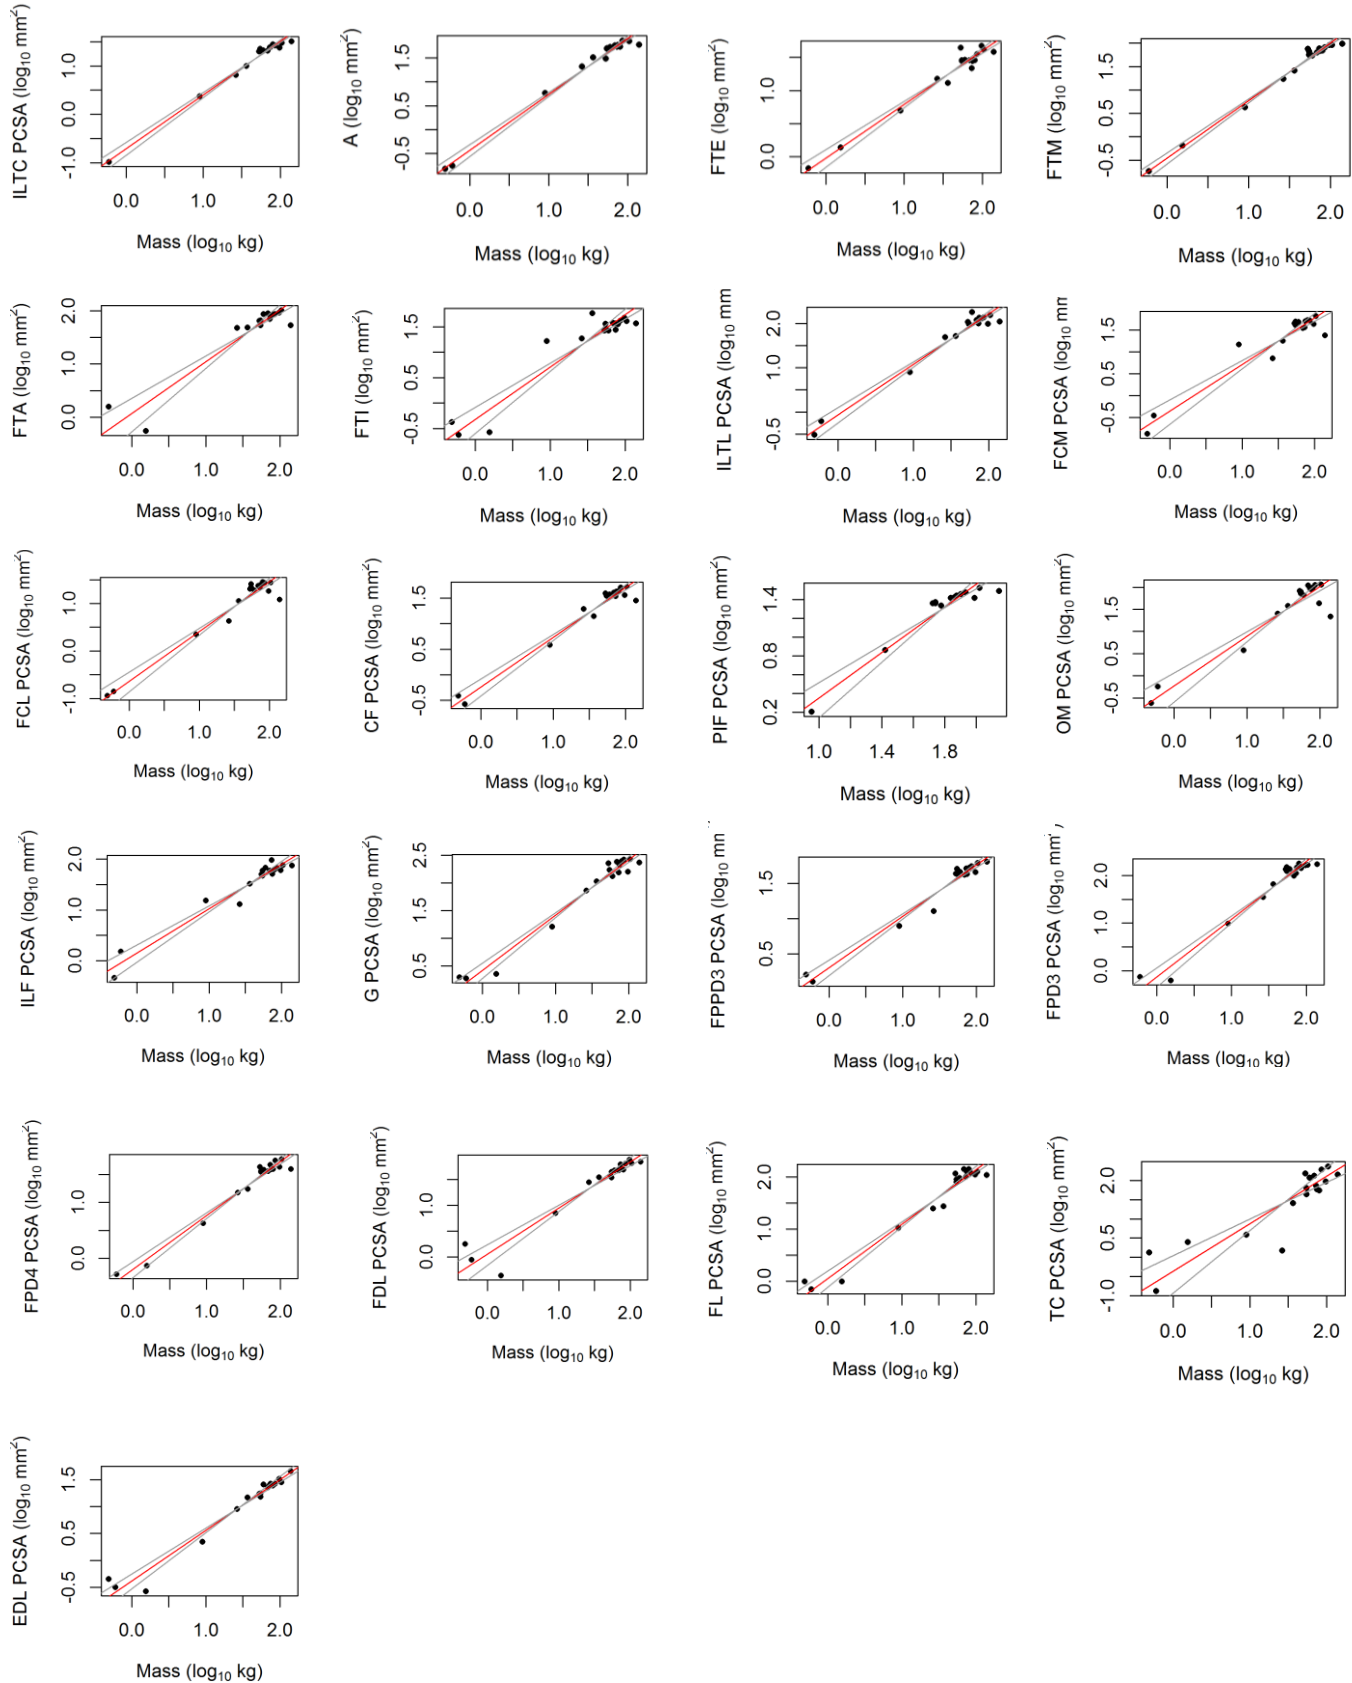

**Figure S5. Relationship between (a) ( $\log_{10}$ ) tendon mass and ( $\log_{10}$ ) bird mass; (b) ( $\log_{10}$ ) tendon length and ( $\log_{10}$ ) bird mass; and (c) ( $\log_{10}$ ) tendon cross sectional area (CSA) and ( $\log_{10}$ ) bird mass for each individual tendon. Red line indicates linear fit of reduced major axis regression. Grey lines indicate 95 % confidence intervals of the regression. Abbreviations: G - Gastrocnemius; FPPD3 – Flexor perforans et perforatus digiti III; FPD3 – Flexor perforatus digiti III; FPD4 – Flexor perforatus digiti IV; FDL – Flexor digitorum longus; FL – Fibularis longus; TC – Tibialis cranialis; EDL – Extensor digitorum longus**

**A**

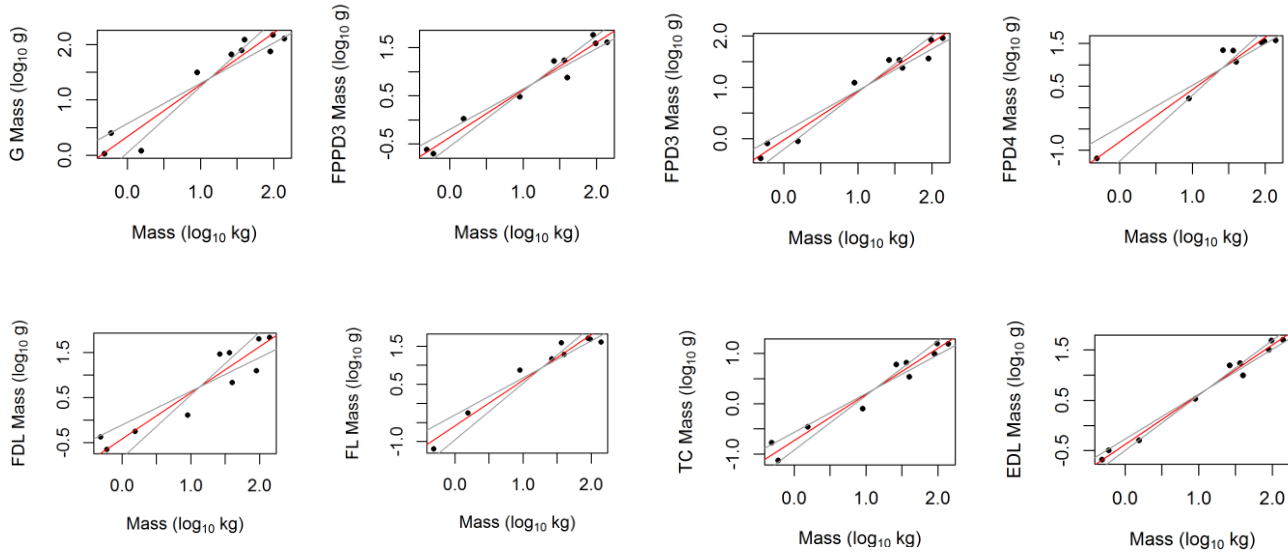

**B**

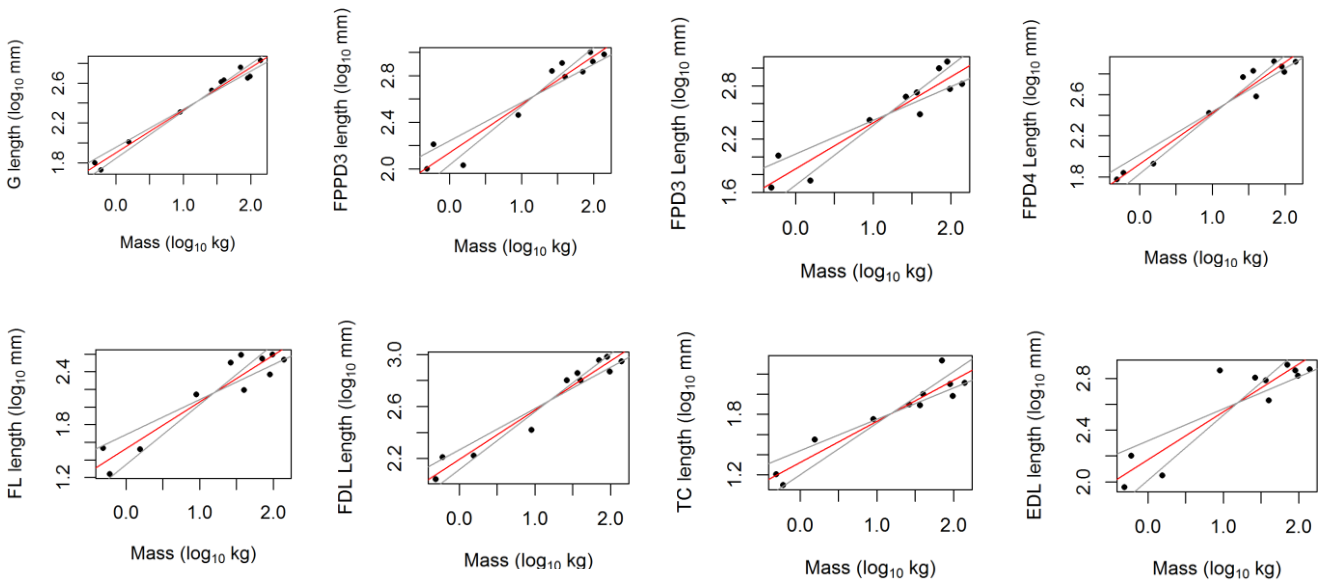

**C**

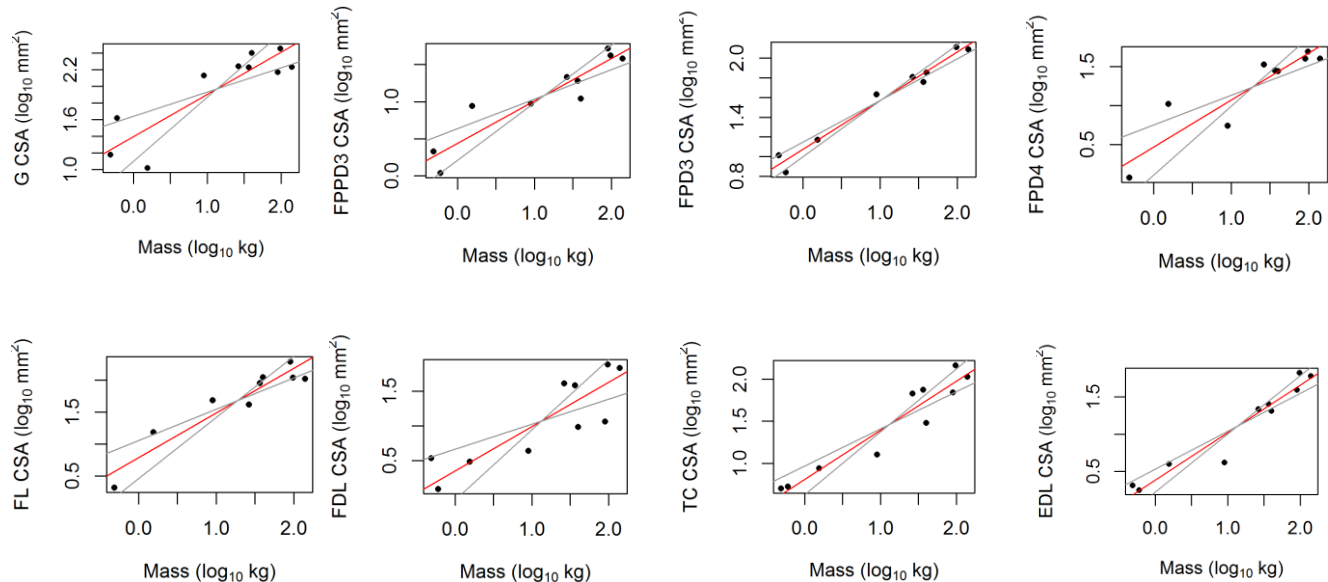

**Figure S6. Relationship between ( $\log_{10}$ ) bird mass and (a) ( $\log_{10}$ ) tendon cross sectional area ( $CSA_B$ ); (b) ( $\log_{10}$ ) tendon stiffness; (c) ( $\log_{10}$ ) tendon Young's Modulus; (d) ( $\log_{10}$ ) tendon energy storage; (e) ( $\log_{10}$ ) tendon energy return; and (f) ( $\log_{10}$ ) tendon hysteresis for each individual tendon used for mechanical testing. Red line indicates linear fit of reduced major axis regression. Grey lines indicate 95 % confidence intervals of the regression. Abbreviations: FPD3 – Flexor perforatus digiti III; FPD4 – Flexor perforatus digiti IV; EDL – Extensor digitorum longus**

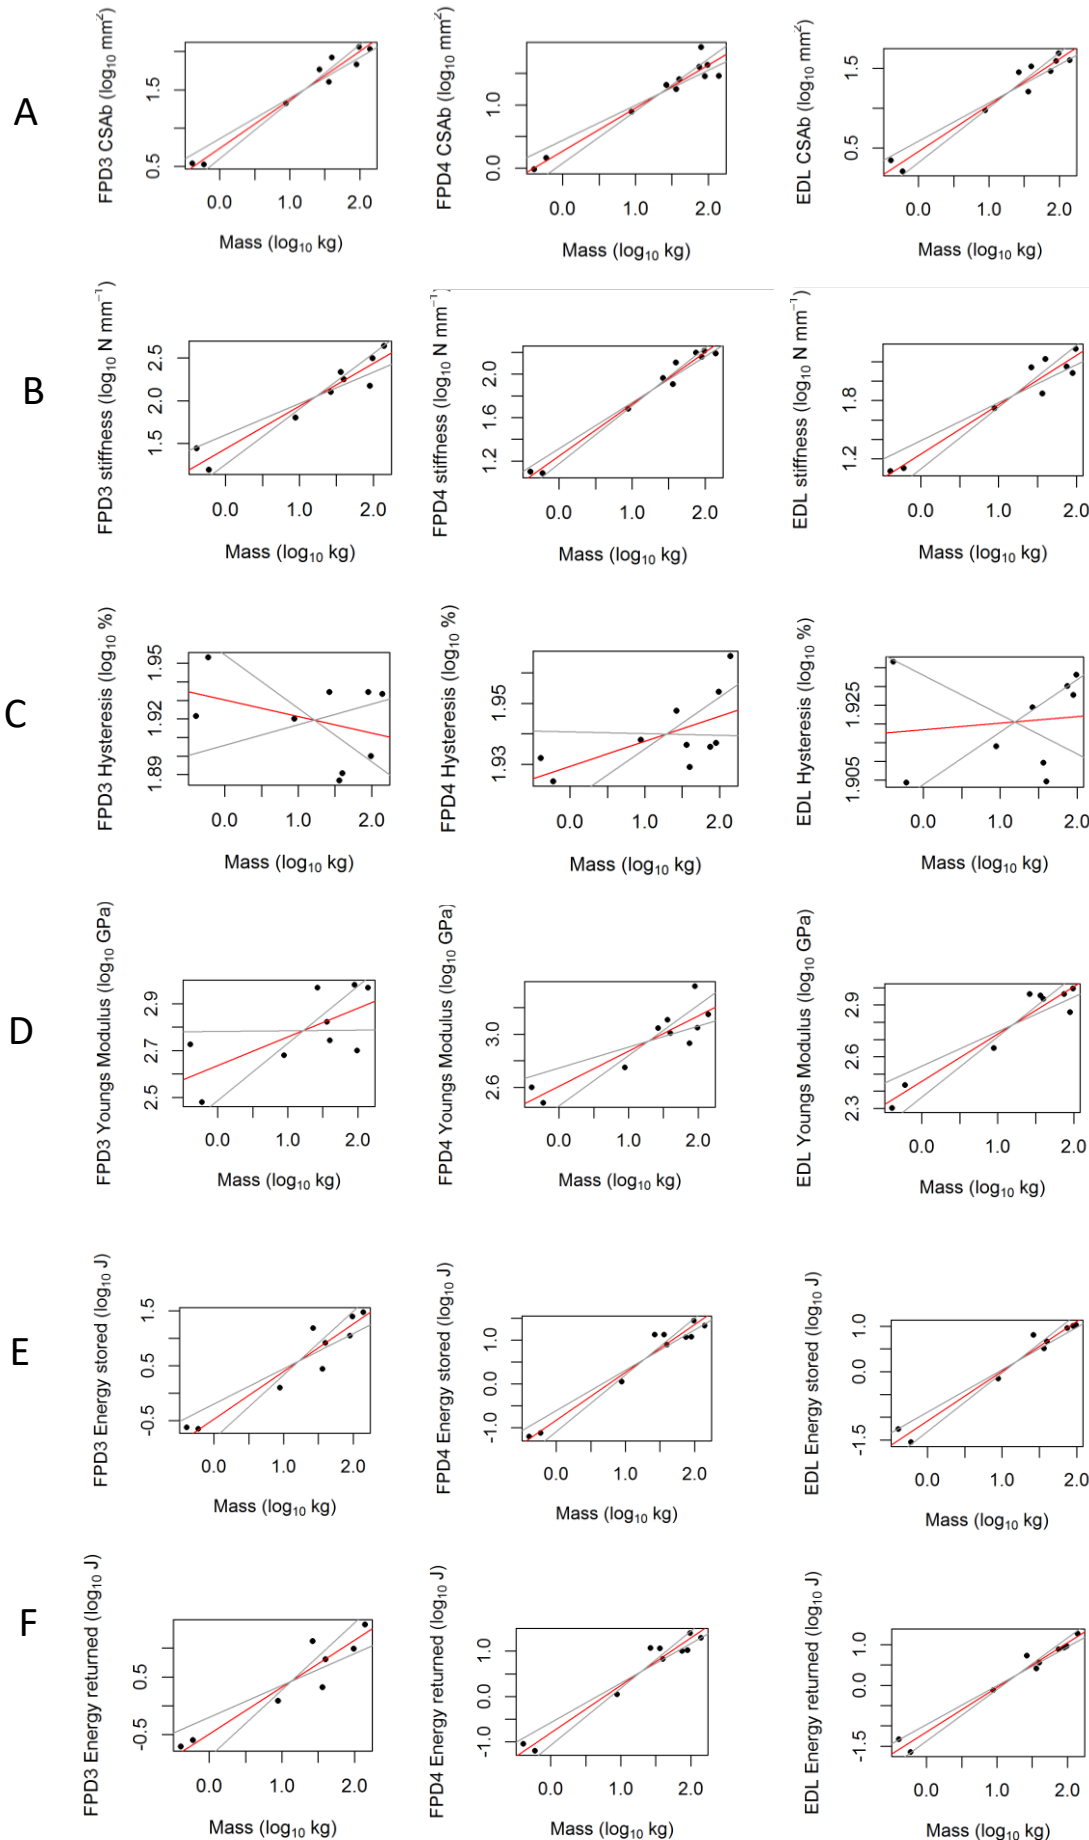

Supplement: jexbio-222-182741-s1.pdf [file jexbio-222-182741-s1.pdf]
